# Supplementary material for: Tuning the Antigen Density Requirement for CAR T-cell Activity
Source: Oxford University Press journal article supplement (doi:10.1158/2159-8290.cd-19-0945), 2020-03-19
Supplement: 21598290cd190945-sup-227163_2_supp_6151912_q70lpr.docx [file 21598290cd190945-sup-227163_2_supp_6151912_q70lpr.docx]

Supplementary Table 1: CAR component sequences

| **scFv’s (including linker between heavy and light variable chains):** | |
| --- | --- |
| CD19 scFv (FMC63.3) | DIQMTQTTSSLSASLGDRVTISCRASQDISKYLNWYQQKPDGTVKLLIYHTSRLHSGVPSRFSGSGSGTDYSLTISNLEQEDIATYFCQQGNTLPYTFGGGTKLEITGSTSGSGKPGSGEGSTKGEVKLQESGPGLVAPSQSLSVTCTVSGVSLPDYGVSWIRQPPRKGLEWLGVIWGSETTYYNSALKSRLTIIKDNSKSQVFLKMNSLQTDDTAIYYCAKHYYYGGSYAMDYWGQGTSVTVSS |
| Her2 scFv (4D5) | DIQMTQSPSSLSASVGDRVTITCRASQDVNTAVAWYQQKPGKAPKLLIYSASFLESGVPSRFSGSRSGTDFTLTISSLQPEDFATYYCQQHYTTPPTFGQGTKVEIKGSTSGSGKPGSGEGSGEVQLVESGGGLVQPGGSLRLSCAASGFNIKDTYIHWVRQAPGKGLEWVARIYPTNGYTRYADSVKGRFTISADTSKNTAYLQMNSLRAEDTAVYYCSRWGGDGFYAMDVWGQGTLVTVSS |
| B7-H3 scFv (MGA271) | DTEVQLVESGGGLVQPGGSLRLSCAASGFTFSSFGMHWVRQAPGKGLEWVAYISSDSSAIYYADTVKGRFTISRDNAKNSLYLQMNSLRDEDTAVYYCGRGRENIYYGSRLDYWGQGTTVTVSSGGGGSGGGGSGGGGSDIQLTQSPSFLSASVGDRVTITCKASQNVDTNVAWYQQKPGKAPKALIYSASYRYSGVPSRFSGSGSGTDFTLTISSLQPEDFATYYCQQYNNYPFTFGQGTKLEIK |
| **Hinge domains:** | |
| CD28 Hinge | IEVMYPPPYLDNEKSNGTIIHVKGKHLCPSPLFPGPSKP |
| CD8 Hinge | TTTPAPRPPTPAPTIASQPLSLRPEACRPAAGGAVHTRGLDFACD |
| **Transmembrane domains:** | |
| CD28 Transmembrane | FWVLVVVGGVLACYSLLVTVAFIIFWV |
| CD8 Transmembrane | IYIWAPLAGTCGVLLLSLVITLYC |
| **Costimulatory domains:** | |
| CD28 | RSKRSRLLHSDYMNMTPRRPGPTRKHYQPYAPPRDFAAYR**S** |
| 4-1BB | KRGRKKLLYIFKQPFMRPVQTTQEEDGCSCRFPEEEEGGCEL |
| **CD3ζ domains:** | |
| CD3ζ | RVKFSRSADAPAYQQGQNQLYNELNLGRREEYDVLDKRRGRDPEMGGKPRRKNPQEGLYNELQKDKMAEAYSEIGMKGERRRGKGHDGLYQGLSTATKDTYDALHMQALPPR |
| CD3ζ* (truncated) | RVKFSRSADAPAYQQGQNQLYNELNLGRREEYDVLDKRRGRDPEMGGK |
| CD3ζζ | RVKFSRSADAPAYQQGQNQLYNELNLGRREEYDVLDKRRGRDPEMGGKPRRKNPQEGLYNELQKDKMAEAYSEIGMKGERRRGKGHDGLYQGLSTATKDTYDALHMQALPPRRVKFSRSADAPAYQQGQNQLYNELNLGRREEYDVLDKRRGRDPEMGGKPRRKNPQEGLYNELQKDKMAEAYSEIGMKGERRRGKGHDGLYQGLSTATKDTYDALHMQALPPR |

**Supplementary Figure 1: Large interpatient variability in expression of surface targets in B-NHL.** Primary diagnostic samples of DLBCL, MCL, FL, and CLL were stained for expression of CD20, CD22, CD79b, Ig-κ, and Ig-λ and compared to normal B cells from healthy donors. (a) Shown is protein expression, relative to healthy donor PBMC B cells on a Log2 scale. DLBCL: n=17, FL: n=27, CLL: n=13, MCL: n=42. Healthy donor PBMC B cells: n=3. Statistical differences between groups were analyzed by one-way ANOVA non-parametric test with Dunns post-test correction. (b) Representative contour plots depicting CD20, CD22, CD79b, Ig-κ, and Ig-λ expression for three DLBCL cases and PBMC from healthy donors. (c) Number of target molecules on the surface of healthy B cells as semiquantitatively estimated using flow cytometry and the Quantibrite kit. p < 0.05 was considered statistically significant, and p values are denoted with asterisks as follows: p > 0.05, not significant, NS; * p < 0.05, ** p < 0.01, *** p < 0.001, and **** p < 0.0001.

**Supplementary Figure 2: CD19 signaling is not required for the *in vivo* activity of CD19 CAR T cells.**

(a) Flow cytometric analysis showing the comparison of CD19 expression levels between a Nalm6 clone expressing 45,851 molecules of truncated CD19 (extracellular and transmembrane portions only) and the Nalm6 wildtype cell line. (b) One million NALM6-CD1945,851 cells were engrafted into NSG mice by tail vein injection. Three days later, mice were injected with 3 million CD19-CD28ζ CAR T cells, CD19-4-1BBζ CAR T cells, or untransduced control T cells (MOCK). Tumor progression was measured by bioluminescence photometry and flux values (photons per second) were calculated using Living Image software. Mean values for groups are shown. Representative results of two experiments with different T cell donors (n=5 mice per group). Statistical analysis performed with repeated measures ANOVA. Error bars represent SEM. p < 0.05 was considered statistically significant, and p values are denoted with asterisks as follows: p > 0.05, not significant, NS; * p < 0.05, ** p < 0.01, *** p < 0.001, and **** p < 0.0001.

**Supplementary Figure 3: Phenotypic characterization of CD19 and Her2 CAR T cells used for *in vivo* experiments throughout the manuscript.** (a) Flow cytometry of cell surface CAR expression and exhaustion marker (PD-1, LAG3, TIM3) expression for the indicated CAR constructs (top CD19, bottom Her2) performed on Day +10 after T cell activation. (b) CD4/CD8 percentages for the indicated CAR constructs measured by flow cytometry on day +10 after T cell activation. (c) Baseline interferon gamma production by CAR T cells over 24 hours was measured by ELISA for the indicated constructs. Data in this figure is representative of at least three transductions with different T cell donors.

**Supplementary Figure 4: Her2-CD28ζ CAR T cells display superior *in vivo* activity compared to Her2-4-1BBζ CAR T cells against low antigen density tumors.** (a) Schema of CARs employed in these experiments. (b) Expression of Her2 by flow cytometry on NALM6-Her2 engineered cell lines as well as the 143b Her2low osteosarcoma cell line. (c) Her2-CD28ζ and Her2-4-1BBζ CAR T cells were cocultured with NALM6 clones engineered to express various amounts of Her2 for 24 hours and secreted IL-2 was measured in the supernatant by ELISA. Representative of three experiments with different T cell donors. Statistical comparisons performed with the student’s t-test (two sided). (d) One million 143b osteosarcoma cells were orthotopically implanted in the hind leg of NSG mice. After seven days, mice were treated intravenously with 10 million Her2-CD28ζ CAR T cells, Her2-4-1BBζ CAR T cells, or untransduced control T cells (MOCK). Leg measurements were obtained twice weekly with digital calibers. Measurements for individual mice are shown. Statistical analysis performed with repeated measures ANOVA. (e) Survival curves for mice treated as in (d). Statistical analysis performed with the log-rank test. (d-e) are representative of three experiments with different T cell donors (n=5 mice per group). For *in vitro* experiments, error bars represent SD and for *in vivo* experiments, error bars represent SEM. p < 0.05 was considered statistically significant, and p values are denoted with asterisks as follows: p > 0.05, not significant, NS; * p < 0.05, ** p < 0.01, *** p < 0.001, and **** p < 0.0001.

**Supplementary Figure 5: The presence of high antigen density tumor cells does not enhance CAR efficacy against low antigen density tumor cells.** (a) One million NALM6-CD192,053 cells (expressing GFP-luciferase) were engrafted into NSG mice by tail vein injection. On D+1, 0.5 million NALM6-WT (not expressing GFP-luciferase) were injected into one of two groups of mice. On D+4, mice were injected with 3 million CD19-4-1BBζ CAR T cells. Tumor progression was measured by bioluminescence photometry and flux values (photons per second) were calculated using Living Image software. Quantified tumor flux values for individual mice are shown. Statistical analysis performed with repeated measures ANOVA. (b) Mouse survival curves for mice as treated in (a). Statistical analysis performed with the log-rank test. Performed one time (n=5 per group). p < 0.05 was considered statistically significant, and p values are denoted with asterisks as follows: p > 0.05, not significant, NS; * p < 0.05, ** p < 0.01, *** p < 0.001, and **** p < 0.0001.

**Supplementary Figure 6: CAR expression and baseline interferon gamma production for additional CD19 and B7-H3 constructs in this manuscript.** (a-e) Flow cytometry of cell surface CAR expression for the indicated CAR constructs. (f-i) Baseline interferon gamma production by CAR T cells over 24 hours was measured by ELISA for the indicated constructs. Data in this figure is representative of at least three experiments with different T cell donors.

**Supplementary Figure 7: *In vivo* T cell persistence and exhaustion phenotyping.** (a-d) Additional timepoints from experiment described in Figure 5h-i. The spleens (a-b) and bone marrow (c-d) of treated mice were obtained at Day +9 (a,c) as well as Day +29 (b,d) post-CAR treatment. CAR T cell presence was assessed by flow cytometry. (e,f) Expression of exhaustion markers analyzed by flow cytometry of CAR+ T cells obtained from the spleens from mice at the indicated timepoints. Performed one time (n=5 per CAR construct per timepoint). Statistical comparisons performed by Mann Whitney between the indicated groups. Error bars represent SD.

**Supplementary Figure 8: B7-H3 expression is lower on neuroblastoma than other tumors, resulting in reduced CAR activity.** (a) B7-H3 surface molecule number was assessed on a panel of tumor cell lines using the BD Quantibrite kit and are shown by histologic group (high grade CNS glioma, bone sarcomas, and neuroblastoma). Statistical analysis performed with the student’s t-test (two sided). Representative of two experiments. (b) CHLA255 neuroblastoma cells were cocultured at a 4:1 ratio with either B7-H3-4-1BBζ or B7-H3-CD28H/T-4-1BBζ CAR T cells and tumor cell killing was measured in an Incucyte assay. Representative of three experiments with different T cell donors. Statistical analysis performed with repeated measures ANOVA. Error bars represent SD. p < 0.05 was considered statistically significant, and p values are denoted with asterisks as follows: p > 0.05, not significant, NS; * p < 0.05, ** p < 0.01, *** p < 0.001, and **** p < 0.0001.

**Supplementary Figure 9: CARs containing a CD28H/T region and 4-1BBζ endodomains mediate qualitatively distinct downstream signaling events compared to those with traditional CAR architectures.** (a) CD19-CD28ζ, CD19-4-1BBζ, and CD19-CD28H/T-4-1BBζ CAR T cells were stimulated for five minutes with idiotype and crosslinking antibodies. pERK and total ERK were measured by Western blot. Performed one time. (b) CD19-CD28ζ, CD19-4-1BBζ, and CD19-CD28H/T-4-1BBζ CAR T cells were loaded with Indo-1 ratiometric dye and then stimulated with 5 μg/mL of anti-idiotype antibody and 5 μg/mL goat anti-mouse crosslinking antibody. Calcium flux was measured in real time for the three cell populations by flow cytometry. Representative of two experiments with different T cell donors. (c) Her2-CD28ζ, Her2-4-1BBζ, and Her2-CD28H/T-4-1BBζ CAR T cells were loaded with Indo-1 ratiometric dye and then stimulated with 5 μg/mL of Her2-Fc fusion protein and 5 μg/mL of mouse anti-human Fc crosslinking antibody. Calcium flux was measured in real time for the three cell populations by flow cytometry. Representative of two experiments with different T cell donors. (d) CD19-CD28ζ, CD19-4-1BBζ, and CD19-CD28H/T-4-1BBζ CAR T cells were stimulated with idiotype and crosslinking antibodies over a time course ranging from 0 to 45 minutes. pERK, total ERK, pCD3ζ-CAR, and total CD3ζ-CAR were measured by western blot. Additionally, endogenous pCD3ζ, and total CD3ζ were analyzed. Performed two times with different T cell donors. (e) Untransduced (MOCK) and CD19-CD28H/T-4-1BBζ CAR T cells were edited at the TRAC locus using CRISPR-Cas9. Shown is flow cytometric expression of CD3 (y-axis) and CD19 CAR (x-axis). Representative of two experiments with different T cell donors. (f) NALM6 clones expressing either 45,851 (left) or 963 (right) molecules of surface CD19 were cocultured at a 1:1 ratio with CD19-CD28H/T-4-1BBζ +/- TRAC knockout CAR T cells and tumor cell killing was measured in an Incucyte assay. Representative of two experiments with different T cell donors. (g) CD19-CD28H/T-4-1BBζ +/- TRAC knockout CAR T cells were cocultured with NALM6 clones expressing various amounts of CD19 for 24 hours and secreted IL-2 was measured in the supernatant by ELISA. Representative of two experiments with different T cell donors. Statistical comparisons performed by the student’s t-test (two sided). Error bars represent SD. p < 0.05 was considered statistically significant, and p values are denoted with asterisks as follows: p > 0.05, not significant, NS; * p < 0.05, ** p < 0.01, *** p < 0.001, and **** p < 0.0001.**Supplementary Figure 10**

(a) Additional examples of wells from experiments described in Figure 7a. The left demonstrates a lytic conjugate resulting in tumor cell death while the right shows a non-lytic conjugate resulting in CAR T cell death. (b) The fraction of lytic conjugates (events where one T cell and one NALM6 cell remained within a threshold distance, and the NALM6 cell died) was measured in each of six experiments. (c) The fraction of nonlytic conjugates (conjugates where the T cell and tumor cell interacted but the NALM6 cell did not die) that resulted in T cell death was measured in each of six experiments. Statistical analysis in (b, c) performed with a Wilcoxon signed rank test. Error bars represent SD. (d) Flow cytometric analysis of CD19-CD28H/T-4-1BBζ-mCherry and CD19-4-1BBζ-mCherry CAR T cells transduced with a ZAP70-GFP fusion gene. Shown are CAR expression (mCherry) and ZAP70-GFP expression. (e) Confocal (top) and Total Internal Reflection Fluorescence (TIRF, bottom) microscopic images show the localization of CD19-CD28H/T-4-1BBζ-mCherry and CD19-CD8H/T-4-1BBζ-mCherry CARs. Both constructs distribute similarly along the plasma membrane, intracellular vesicles, and the Golgi. TIRF images reveal the plasma membrane pool, for which both constructs show a diffuse localization. (f) Degree of clustering (index of dispersion) for CAR molecules recruited to the immune synapse for each CAR construct at different CD19 densities in the experiment in Figure 7d-j. Data are representative from one experiment with two with different T cell donors. n > 100 per condition. Statistical analysis performed with the student’s t-test.
